# Supplementary material for: Metallic CoSb and Janus Co2AsSb monolayers as promising anode materials for metal-ion batteries
Source: Royal Society of Chemistry journal article supplement (doi:10.1039/d4cp00480a), 2024-01-01
Supplement: d4cp00480a1.pdf [file d4cp00480a1.pdf]

## Metallic CoSb and Janus Co<sub>2</sub>AsSb monolayers as a Promising Anode Materials for Metal-Ion Batteries

Dildar Ahmed, Nisar Muhammad and Z.J. Ding\*

*Hefei National Research Center for Physical Sciences at the Microscale, University of Science  
and Technology of China, Hefei, Anhui 230026, People's Republic of China*

\*E-mail: [zjding@ustc.edu.cn](mailto:zjding@ustc.edu.cn)

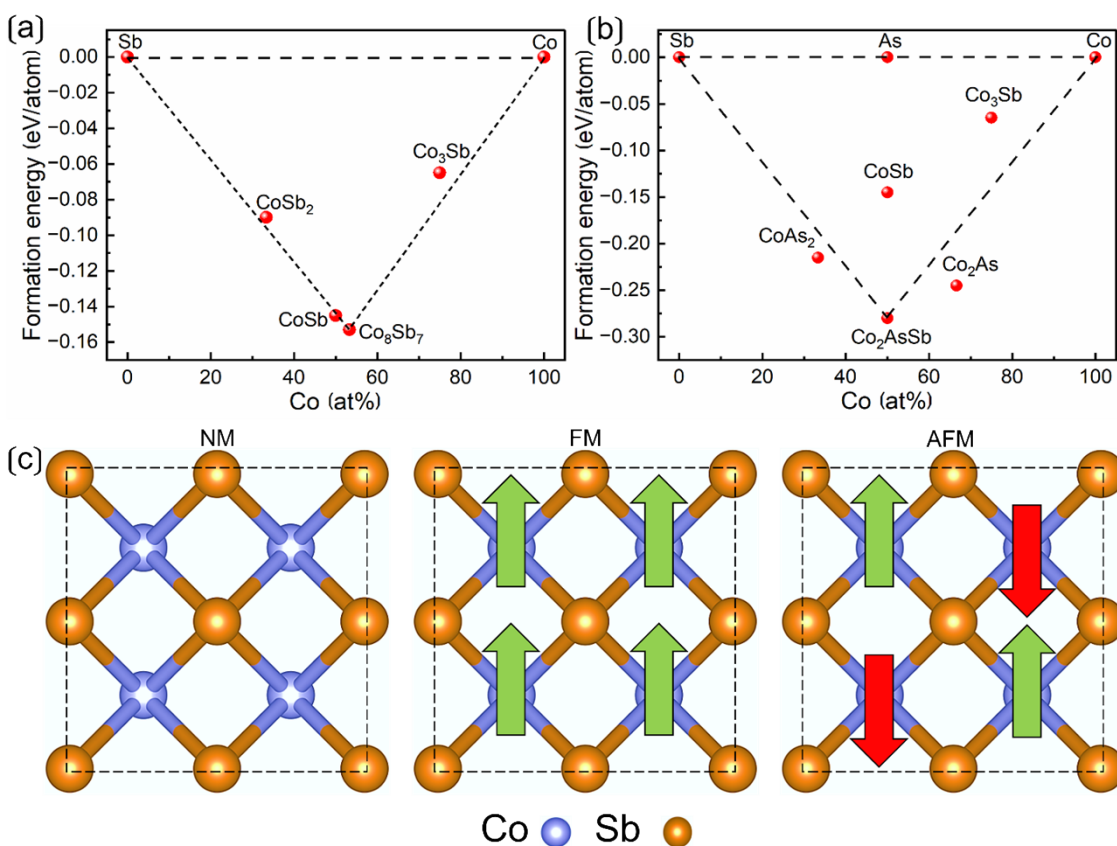

Fig. S1 Formation energy-based convex hull plots, considering different Co compositions for: (a) CoSb and (b) Janus Co<sub>2</sub>AsSb monolayers. (c) Three commonly considered magnetic configurations for energetically stable CoSb: (nonmagnetic (NM), ferromagnetic (FM), and antiferromagnetic (AFM)).

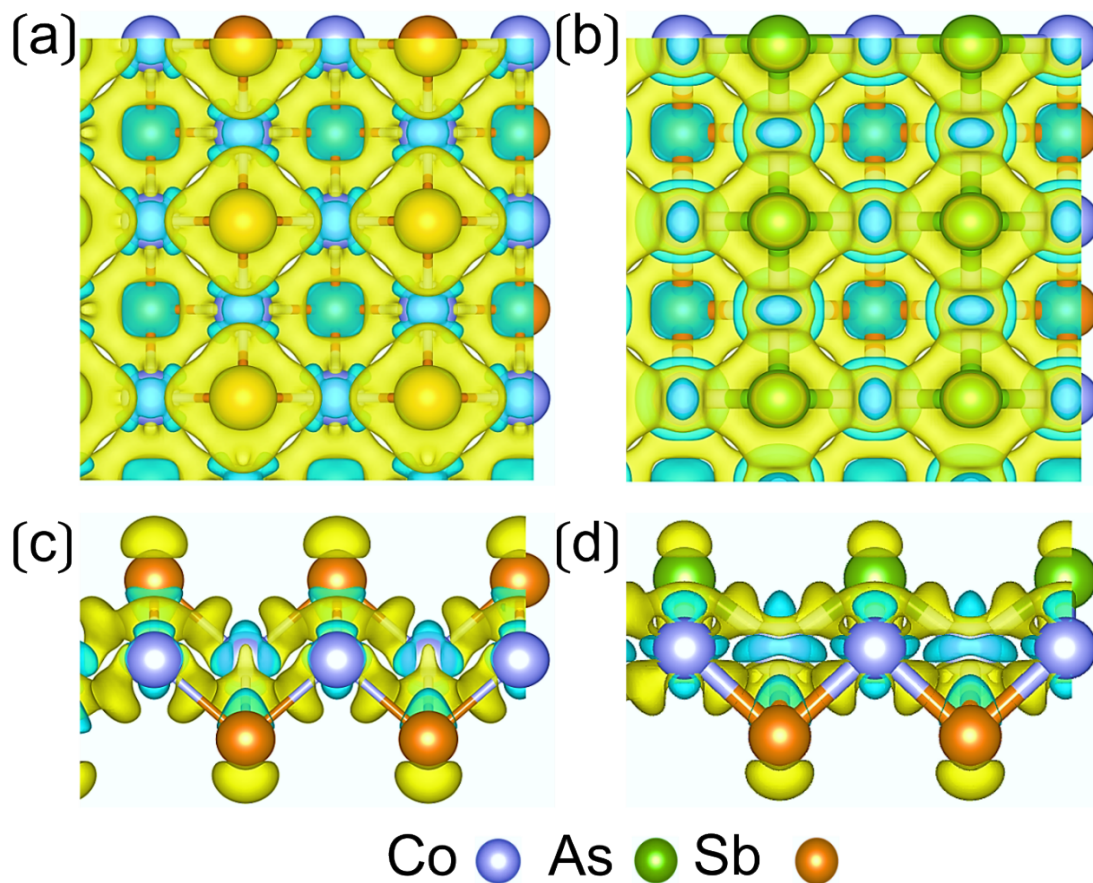

Fig. S2 Charge density difference in CoSb and Janus Co<sub>2</sub>AsSb monolayers. Panels (a, c) show top and side views of the CoSb monolayer, while panels (b, d) depict top and side views of the Janus Co<sub>2</sub>AsSb monolayer. The iso-surface is set at  $0.005 \text{ e}\text{\AA}^3$ , with charge accumulation and depletion areas represented in yellow and cyan, respectively.

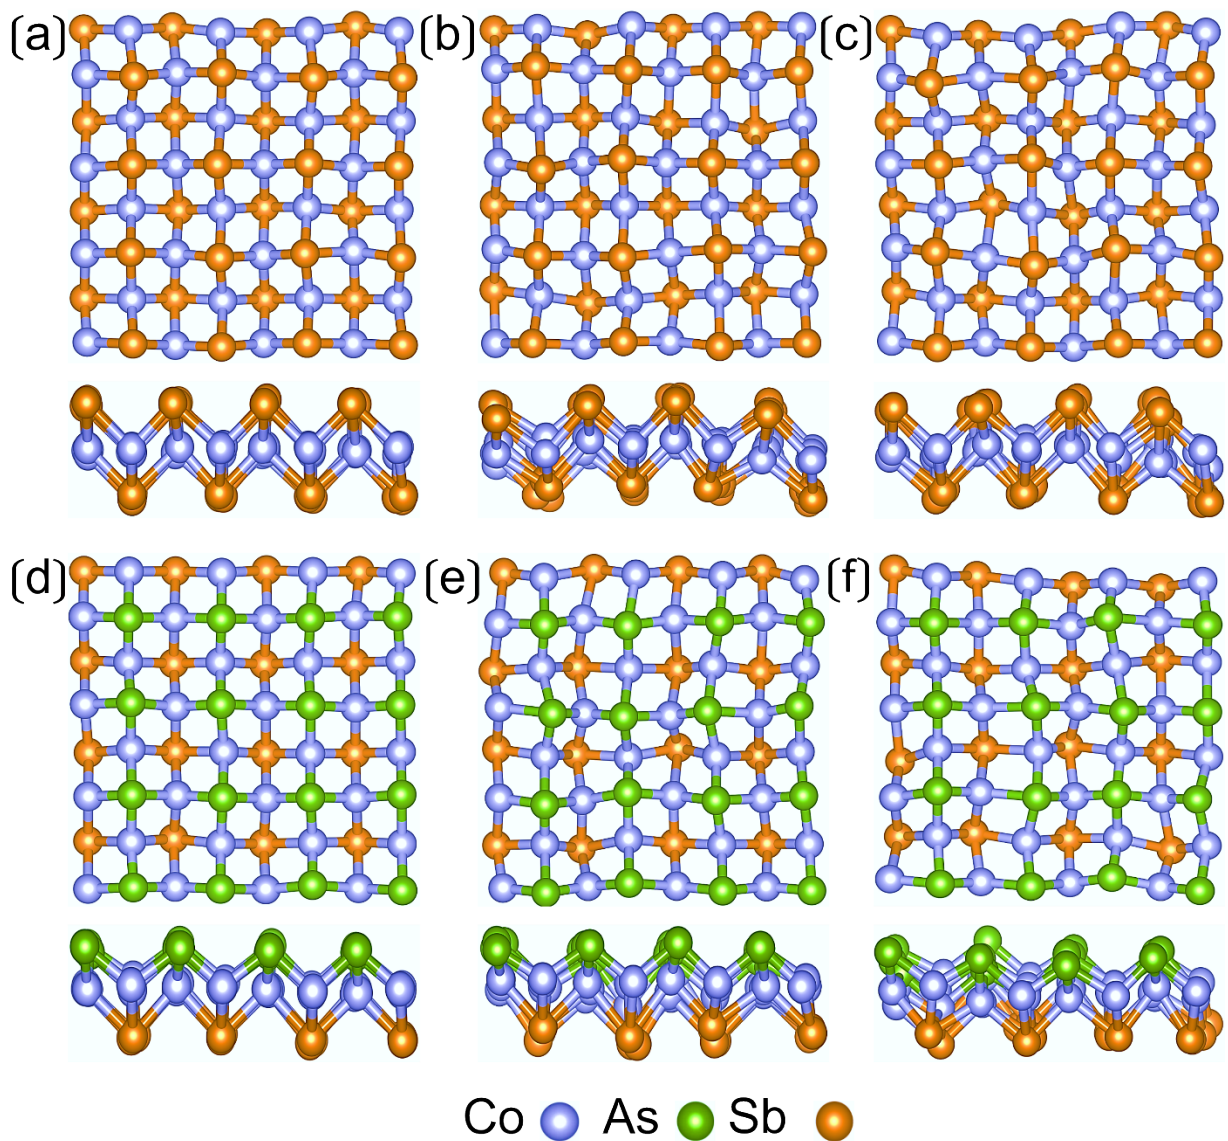

Fig. S3 Atomic structures of CoSb and Janus  $\text{Co}_2\text{AsSb}$  monolayers at the end of 5ps AIMD simulations. This figure displays the top and side views of the CoSb monolayer ( $4 \times 4 \times 1$  supercell) at temperatures of (a) 300 K, (b) 600 K, and (c) 900K, along with  $\text{Co}_2\text{AsSb}$  monolayer ( $4 \times 4 \times 1$  supercell) at (d) 300 K, (e) 600 K, and (f) 900K, respectively.

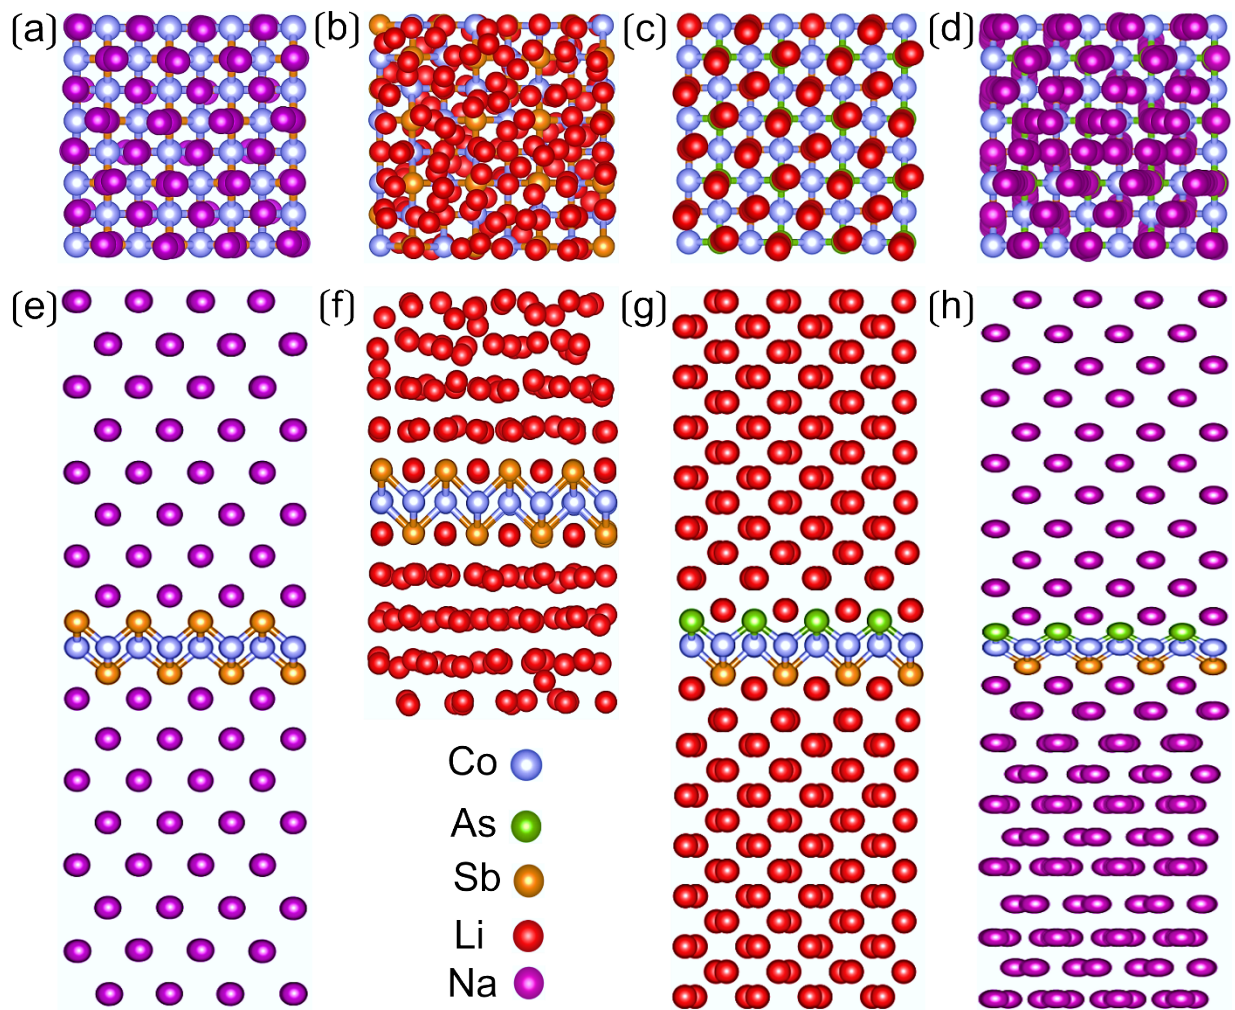

Fig. S4 Top and side views of fully sodiated and fully lithiated monolayers. The figure presents top views of (a) sodiated CoSb, (b) lithiated CoSb, (c) lithiated Janus Co<sub>2</sub>AsSb, (d) sodiated Janus Co<sub>2</sub>AsSb, followed by side views of (e) sodiated CoSb, (f) lithiated CoSb, (g) lithiated Janus Co<sub>2</sub>AsSb, and (h) sodiated Janus Co<sub>2</sub>AsSb monolayers.

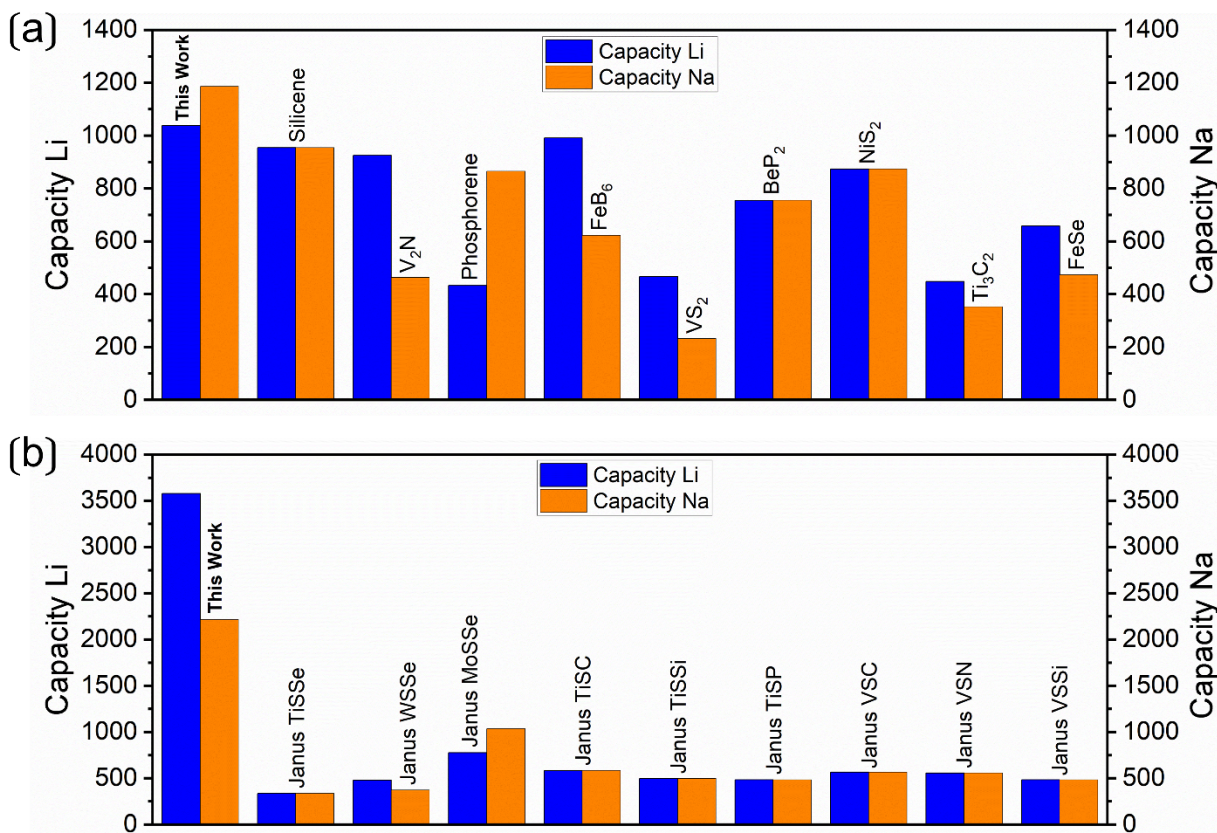

Fig. S5 (a) Comparative analysis of the theoretical specific capacity of Li/Na for various materials including Silicene <sup>1,2</sup>,  $V_2N$  <sup>3</sup>, Phosphorene <sup>4,5</sup>,  $FeB_6$  <sup>6</sup>,  $VS_2$  <sup>7,8</sup>,  $BeP_2$  <sup>9</sup>,  $NiS_2$  <sup>10</sup>,  $Ti_3C_2$  <sup>11</sup>,  $FeSe$  <sup>12</sup>, and this work (CoSb monolayer). (b) Comparative analysis of the theoretical specific capacity of Li/Na for Janus structures, including  $TiSSe$  <sup>13</sup>,  $WSSe$  <sup>14</sup>,  $MoSSe$  <sup>15,16</sup>,  $TiSC$  <sup>17</sup>,  $TiSSi$  <sup>17</sup>,  $TiSP$  <sup>17</sup>,  $VSC$  <sup>17</sup>,  $VSN$  <sup>17</sup>,  $VSSi$  <sup>17</sup>, and this work (Janus  $Co_2AsSb$  monolayer).

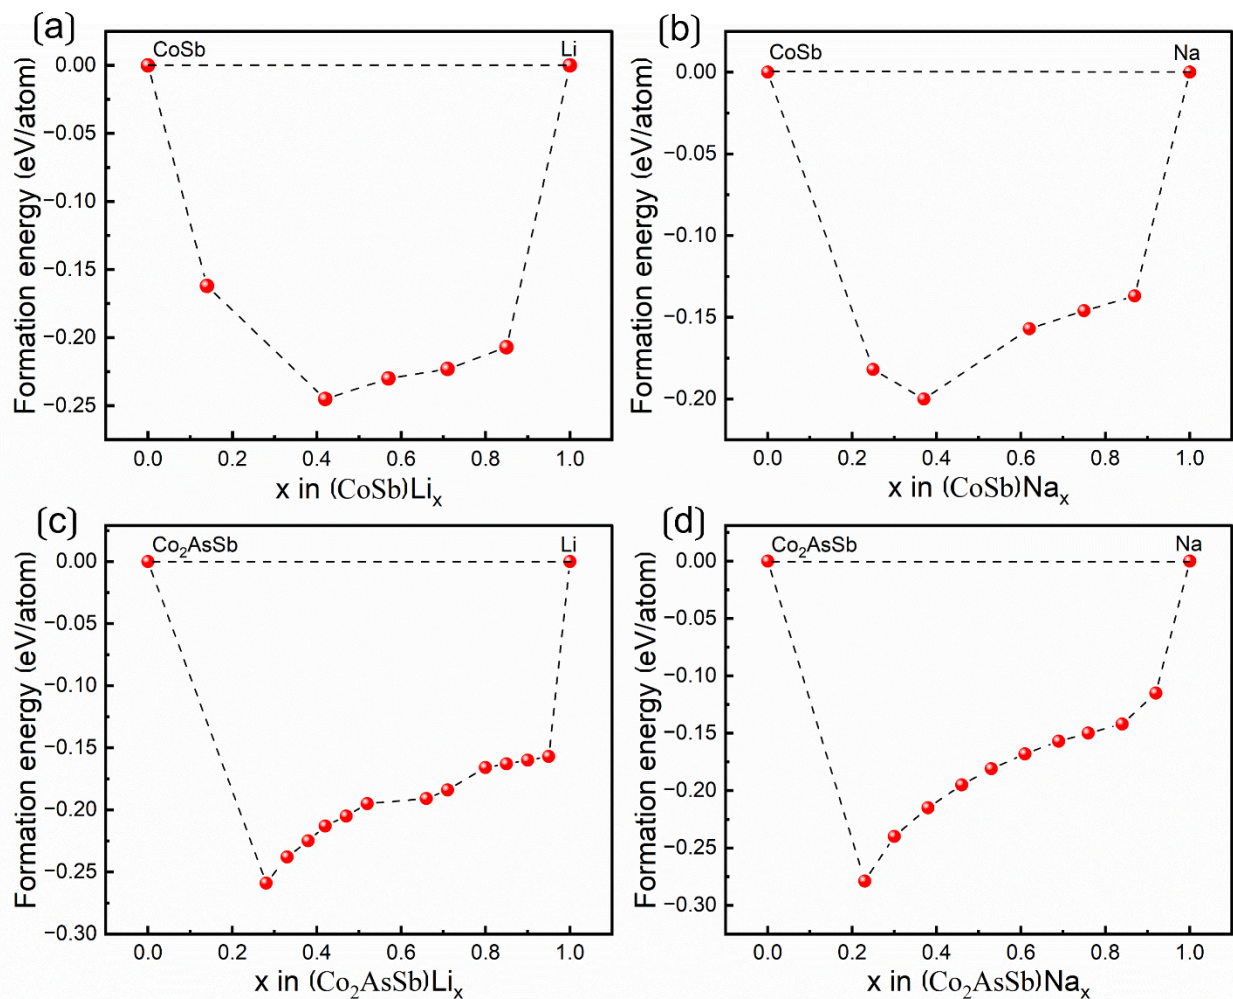

Fig. S6 Formation energy-based convex hull plots for: (a) Li-intercalated CoSb, (b) Na-intercalated CoSb, (c) Li-intercalated Janus  $\text{Co}_2\text{AsSb}$  and (d) Na-intercalated Janus  $\text{Co}_2\text{AsSb}$ .

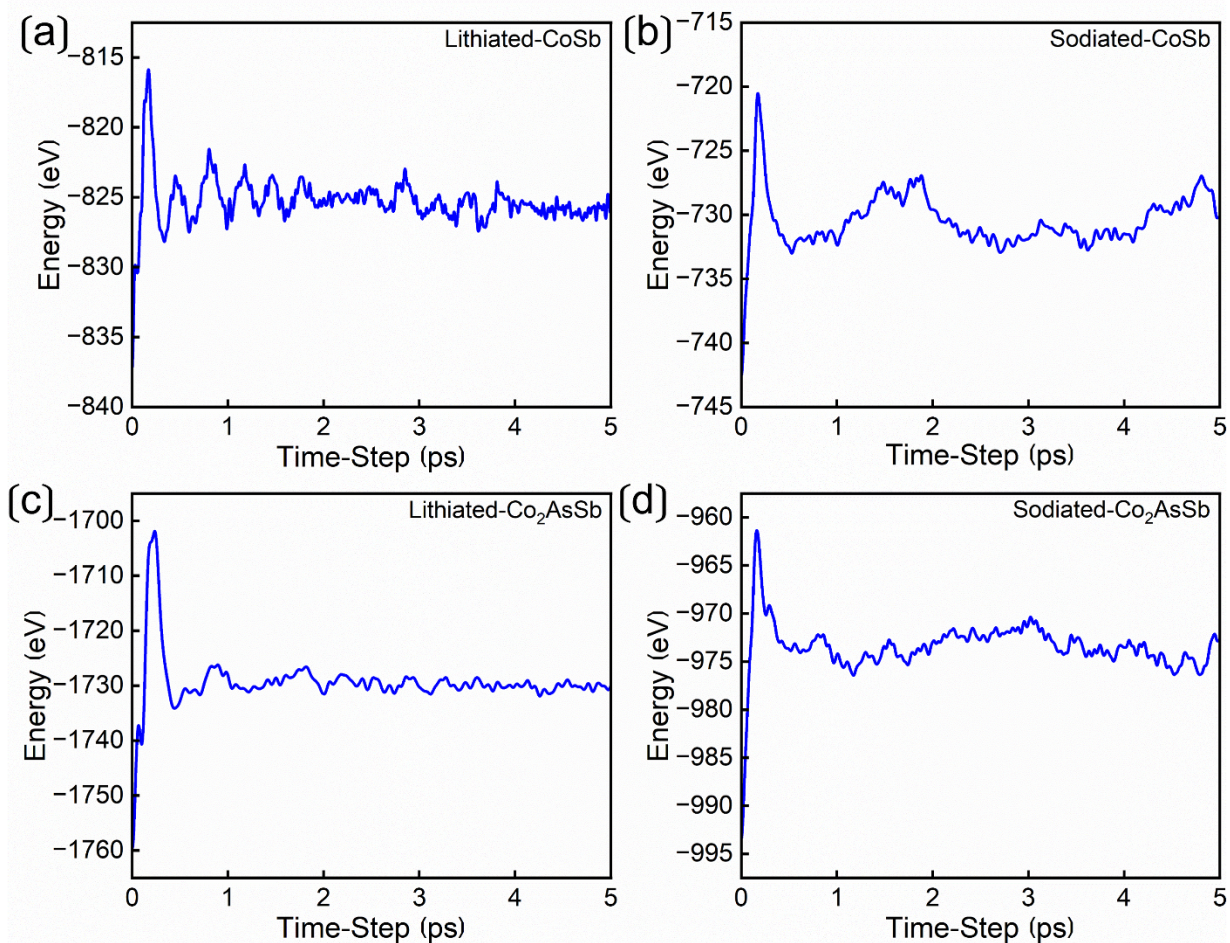

Fig. S7 Evolution of total energy in AIMD simulations at 300K over a 5.0 ps timescale for: (a) fully lithiated CoSb, (b) fully sodiated CoSb, (c) fully lithiated Janus Co<sub>2</sub>AsSb and (d) fully sodiated Janus Co<sub>2</sub>AsSb monolayers. These results indicate that both monolayered systems are thermodynamically stable.

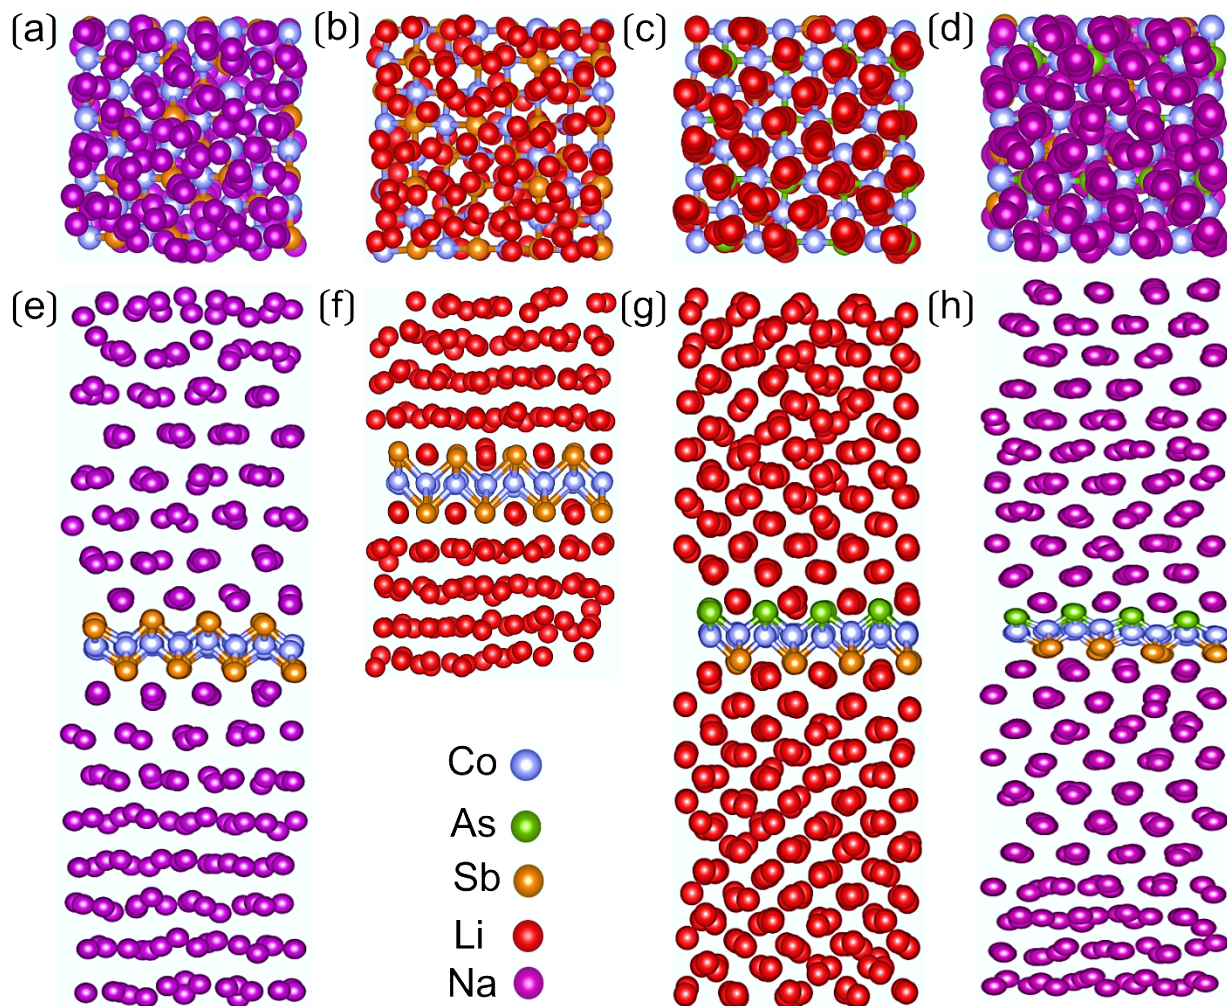

Fig. S8. Geometric configurations of fully lithiated and fully sodiated CoSb and Janus Co<sub>2</sub>AsSb monolayers observed during AIMD simulations at 300K over a timescale of 5 ps. The Figure also presents top views of (a) sodiated CoSb, (b) lithiated CoSb, (c) lithiated Janus Co<sub>2</sub>AsSb, (d) sodiated Janus Co<sub>2</sub>AsSb, followed by side views of (e) sodiated CoSb, (f) lithiated CoSb, (g) lithiated Janus Co<sub>2</sub>AsSb, and (h) sodiated Janus Co<sub>2</sub>AsSb monolayers.

## References

- (1) A. Y. Galashev and A. S. Vorob'ev, First principle modeling of a silicene anode for lithium ion batteries, *Electrochim. Acta*, 2021, **378**, 138143.
- (2) J. Zhu and U. Schwingenschlögl, Silicene for Na-Ion Battery Applications, *2D Mater.*, 2016, **3**, 035012.



- (3) H. Liu, Y. Cai, Z. Guo and J. Zhou, Two-dimensional V<sub>2</sub>N MXene monolayer as a high-capacity anode material for lithium-ion batteries and beyond: First-principles calculations, *ACS Omega*, 2022, **7**, 17756-17764.
- (4) S. Zhao, W. Kang and J. Xue, The Potential Application of Phosphorene as an Anode Material in Li-Ion Batteries, *J. Mater. Chem. A*, 2014, **2**, 19046-19052.
- (5) V. V. Kulish, O. I. Malyi, C. Persson and P. Wu, Phosphorene as an anode material for Na-ion batteries: A first-principles study, *Phys. Chem. Chem. Phys.*, 2015, **17**, 13921-13928.
- (6) Y. Wu, H. Li and J. Hou, A first-principle study of FeB<sub>6</sub> monolayer as a potential anode material for Li-ion and Na-ion batteries, *Comput. Mater. Sci.*, 2021, **190**, 110273.
- (7) D. B. Putungan, S.-H. Lin and J.-L. Kuo, Metallic VS<sub>2</sub> monolayer polytypes as potential sodium-ion battery anode via ab initio random structure searching, *ACS Appl. Mater. Interfaces*, 2016, **8**, 18754-18762.
- (8) Y. Jing, Z. Zhou, C. R. Cabrera and Z. Chen, Metallic VS<sub>2</sub> monolayer: A promising 2D anode material for lithium ion batteries, *J. Phys. Chem. C*, 2013, **117**, 25409-25413.
- (9) C. Chen, S. Guo, S. Gao, W. Chen, E. Abduryim, Y. Kuai, G. Wu, X. Guan and P. Lu, Metallic 1H-BeP<sub>2</sub> monolayer as a potential anode material for Li-ion/Na-ion batteries: A first principles study, *Colloids Surf.*, 2023, **662**, 131037.
- (10) R. Ku, L. Yan, K. Xue, J. Zhang, K. Pang, M. Sha, B.-T. Wang, Y. Jiang, L. Zhou and W. Li, NiX<sub>2</sub> (X = S, Se, and Te) monolayers: Promising anodes in Li/Na-ion batteries and superconductors, *J. Phys. Chem. C*, 2022, **126**, 6925-6933.
- (11) D. Er, J. Li, M. Naguib, Y. Gogotsi and V. B. Shenoy, Ti<sub>3</sub>C<sub>2</sub> MXene as a high capacity electrode material for metal (Li, Na, K, Ca) ion batteries, *ACS Appl. Mater. Interfaces*, 2014, **6**, 11173-11179.
- (12) X. Lv, F. Li, J. Gong, J. Gu, S. Lin and Z. Chen, Metallic FeSe monolayer as an anode material for Li and non-Li ion batteries: A DFT study, *Phys. Chem. Chem. Phys.*, 2020, **22**, 8902-8912.
- (13) F. Xiong and Y. Chen, A First-Principles Study of Janus Monolayer TiSSe and VSSe as Anode Materials in Alkali Metal Ion Batteries, *Nanotechnology*, 2021, **32**, 025702.
- (14) S. Ahmad, H. U. Din, S. Nawaz, S.-T. Nguyen, C. Q. Nguyen and C. V. Nguyen, First principles study of the adsorption of alkali metal ions (Li, Na, and K) on janus WSSe monolayer for rechargeable metal-ion batteries, *Appl. Surf. Sci.*, 2023, **632**, 157545.
- (15) C. Shang, X. Lei, B. Hou, M. Wu, B. Xu, G. Liu and C. Ouyang, Theoretical prediction of janus MoSSe as a potential anode material for lithium-ion batteries, *J. Phys. Chem. C*, 2018, **122**, 23899-23909.
- (16) A. Sharma, M. S. Khan, M. S. Khan and M. Husain, Ab initio study of molybdenum sulfoselenides alloy as a flexible anode for sodium-ion batteries, *Appl. Surf. Sci.*, 2021, **536**, 147973.
- (17) W. Chen, Y. Qu, L. Yao, X. Hou, X. Shi and H. Pan, Electronic, magnetic, catalytic, and electrochemical properties of two-dimensional janus transition metal chalcogenides, *Journal of Materials Chemistry A*, 2018, **6**, 8021-8029.
